# Supplementary material for: Identifying the oncogenic roles of FAP in human cancers based on systematic analysis
Source: Aging (Albany NY). 2023 Jul 24;15(14):7056–83. doi: 10.18632/aging.204892 (PMC10415543; doi:10.18632/aging.204892)
Supplement: Supplementary Table 2 [file aging-15-204892-s003.xlsx]

## Sheet: Sheet1
Supplementary Table 2. Relationship between FAP expression and immune cell infiltration in various cancers.
Cell type	TCGA-KIRP(N=285)	TCGA-TGCT(N=132)	TCGA-KIRC(N=528)	TCGA-BRCA(N=1077)	TCGA-THCA(N=503)	TCGA-STES(N=569)	TCGA-BLCA(N=405)	TCGA-PRAD(N=495)	TCGA-ESCA(N=181)	TCGA-GBM(N=152)	TCGA-PCPG(N=177)	TCGA-SKCM(N=452)	TCGA-LUAD(N=500)	TCGA-THYM(N=118)	TCGA-STAD(N=388)	TCGA-OV(N=416)	TCGA-LIHC(N=363)	TCGA-ACC(N=77)	TCGA-HNSC(N=517)	TCGA-GBMLGG(N=654)	TCGA-DLBC(N=46)	TCGA-KICH(N=65)	TCGA-UCEC(N=178)	TCGA-LGG(N=502)	TCGA-PAAD(N=177)	TCGA-LUSC(N=491)	TCGA-SARC(N=258)	TCGA-UVM(N=79)	TCGA-LAML(N=123)	TCGA-UCS(N=56)	TCGA-READ(N=91)	TCGA-CHOL(N=36)	TCGA-COAD(N=282)	TCGA-CESC(N=291)	TCGA-COADREAD(N=373)	TCGA-MESO(N=85)
	(P-value/Cor)	(P-value/Cor)	(P-value/Cor)	(P-value/Cor)	(P-value/Cor)	(P-value/Cor)	(P-value/Cor)	(P-value/Cor)	(P-value/Cor)	(P-value/Cor)	(P-value/Cor)	(P-value/Cor)	(P-value/Cor)	(P-value/Cor)	(P-value/Cor)	(P-value/Cor)	(P-value/Cor)	(P-value/Cor)	(P-value/Cor)	(P-value/Cor)	(P-value/Cor)	(P-value/Cor)	(P-value/Cor)	(P-value/Cor)	(P-value/Cor)	(P-value/Cor)	(P-value/Cor)	(P-value/Cor)	(P-value/Cor)	(P-value/Cor)	(P-value/Cor)	(P-value/Cor)	(P-value/Cor)	(P-value/Cor)	(P-value/Cor)	(P-value/Cor)
Naive B cells	***/0.31	***/-0.4	***/0.19	***/0.12	***/0.17	***/-0.16	***/0.18	***/0.16	***/-0.25	**/0.25	**/0.21	*/-0.12	*/-0.11	*/0.22	*/-0.11	*/0.1	0.09	-0.2	-0.07	0.06	-0.2	-0.12	0.07	0.04	0.05	-0.03	-0.03	-0.05	0.03	-0.04	0.03	-0.05	-0.01	0.01	0	0.01
Memory B cells	***/-0.05	0	-0.06	***/-0.16	*/0.09	**/-0.14	***/-0.34	0.01	**/-0.2	0.07	-0.03	-0.04	-0.02	*/0.23	*/-0.13	***/-0.21	0.07	0.08	***/-0.24	-0.08	0.21	-0.04	*/-0.15	-0.03	0.01	**/-0.15	***/-0.23	0.2	-0.14	0.02	*/-0.24	*/-0.33	-0.05	-0.03	*/-0.1	0.07
Plasma cells	***/0.26	-0.04	0.01	-0.03	*/0.09	***/-0.28	-0.08	***/-0.16	***/-0.35	0.13	0.1	***/-0.18	**/-0.15	***/0.32	***/-0.24	0.04	0.06	-0.03	***/-0.25	-0.01	0.02	0	0.01	-0.04	***/-0.28	**/-0.12	*/-0.15	**/0.32	0.06	-0.01	***/-0.38	0.11	***/-0.38	**/-0.16	***/-0.38	-0.12
CD8 T cells	**/0.16	-0.14	*/-0.11	**/-0.09	***/-0.27	-0.07	-0.07	***/-0.2	**/-0.22	0.04	-0.1	**/-0.15	*/-0.11	-0.13	0	0.07	-0.04	-0.01	***/-0.33	-0.07	-0.25	0.19	0.1	-0.08	-0.05	***/-0.23	0.01	-0.14	-0.15	0.05	-0.07	0.24	***/-0.21	***/-0.23	***/-0.19	0.01
Naive CD4 T cells	0.04	-0.12	-0.05	***/-0.13	-0.07	-0.01	***/-0.29	-0.07	0.03	0.06	NA	0	NA	***/-0.37	-0.03	**/-0.14	***/-0.2	-0.07	-0.01	***/-0.18	NA	*/0.28	-0.05	*/-0.11	0	0	*/-0.15	0.08	0.08	-0.03	-0.07	*/-0.39	-0.09	-0.02	-0.07	NA
Resting CD4 memory T cells	0.02	-0.03	0.06	***/0.21	**/0.12	-0.08	**/0.14	***/0.26	-0.01	-0.15	-0.06	***/0.17	0.05	0.17	*/-0.12	***/0.25	***/0.3	-0.08	***/0.24	0.07	0.23	-0.15	**/0.23	0.09	-0.05	***/0.4	***/-0.22	0.22	0.04	-0.03	-0.18	0.12	***/-0.2	***/0.2	***/-0.19	-0.09
Activated CD4 memory T cells	**/0.19	-0.16	***/0.18	***/-0.13	0.08	0.06	***/0.21	-0.01	0.07	0.05	***/0.42	0.05	**/0.15	***/0.35	0.06	*/0.12	-0.05	*/0.23	***/-0.16	0.07	-0.09	*/0.3	0.09	0.04	0.06	0	**/0.17	-0.03	-0.01	-0.02	*/-0.23	*/0.39	-0.1	0.02	*/-0.13	-0.01
Follicular T helper cells	0.1	-0.09	-0.08	***/-0.29	-0.07	***/-0.21	***/-0.34	***/-0.21	***/-0.3	-0.06	-0.07	***/-0.27	***/-0.19	***/-0.35	**/-0.16	***/-0.19	*/-0.11	0.19	***/-0.38	***/-0.17	*/-0.35	-0.05	*/-0.16	***/-0.2	-0.09	***/-0.37	0.04	-0.04	-0.05	0.12	**/-0.28	-0.07	***/-0.24	***/-0.25	***/-0.25	0.02
Regulatory T cells (Tregs)	**/0.16	0.03	-0.05	-0.06	***/0.3	***/-0.22	***/-0.26	***/0.18	***/-0.37	0.04	0.04	**/-0.12	0.08	-0.14	**/-0.15	-0.04	*/0.13	0.02	***/-0.16	***/0.16	-0.08	0.05	*/-0.15	0.06	0.11	0.05	-0.04	*/-0.22	-0.09	-0.04	-0.05	-0.1	-0.02	**/-0.17	-0.03	-0.01
Gamma delta T cells	-0.04	-0.01	0.01	0.04	0.02	0.07	-0.09	-0.08	0.12	0	NA	0.02	0.02	NA	0.05	0.01	-0.07	0.05	0.05	*/0.09	0.09	-0.12	-0.01	0.06	-0.06	-0.06	-0.04	-0.1	-0.08	0.22	-0.08	NA	-0.06	0.03	-0.06	*/0.28
Resting NK cells	-0.05	-0.17	-0.06	***/-0.18	***/-0.29	0.03	-0.04	**/-0.14	0.07	-0.11	-0.07	-0.04	-0.02	0.14	0.01	-0.08	***/-0.25	0.08	0.02	0.03	0	-0.2	-0.02	-0.04	-0.13	0.09	***/-0.26	0.08	0.04	0.22	0.03	-0.18	-0.06	0.01	-0.04	0.13
Activated NK cells	-0.1	0.07	*/-0.09	***/-0.16	*/-0.09	0	0	-0.02	-0.04	0	***/-0.3	*/-0.11	**/-0.14	**/0.24	0.02	-0.05	-0.05	*/-0.24	**/-0.13	**-0.12	-0.22	-0.2	-0.02	-0.05	***/-0.31	***/-0.2	*/-0.14	-0.06	-0.07	-0.24	*/-0.25	-0.1	-0.04	-0.07	-0.1	-0.1
Monocytes	-0.11	0.01	***/-0.15	**/-0.09	*/-0.1	0.02	***/-0.22	***/-0.16	-0.07	*/0.16	***/-0.27	-0.05	-0.06	-0.15	0.07	***/-0.27	***/-0.35	*/-0.24	**/-0.13	-0.06	-0.27	*/-0.28	-0.15	0.04	-0.1	***/-0.2	***/-0.2	-0.04	0.01	0	-0.08	0	-0.05	*/-0.14	-0.06	-0.2
M0 Macrophages	-0.03	0.08	***/0.16	-0.02	0.06	***/0.18	***/0.28	-0.02	***/0.35	-0.02	***/0.32	*/0.11	*/0.1	***/0.41	0.05	-0.02	*/0.12	*/0.23	***/0.34	***/0.15	0.27	0.23	-0.05	0.06	**/0.24	***/0.24	0.11	0.02	0.09	-0.1	0.18	-0.12	***/0.24	***/0.22	***/0.23	*/0.24
M1 Macrophages	***/0.33	-0.01	-0.06	-0.05	***/0.19	***/0.18	***/0.33	*0.1	0.13	0.1	0.03	0.08	0.08	***/0.34	***/0.21	***/0.25	0.01	**/0.35	0.01	***/0.16	-0.14	-0.07	0.15	***/0.17	0.14	-0.01	0.05	-0.1	-0.01	0.17	0.13	0.12	**/0.18	0.1	**/0.17	-0.07
M2 Macrophages	*/-0.14	***/0.35	**/0.13	*/0.06	**/-0.12	***/0.3	***/0.34	***/0.21	***/0.34	0	*/0.16	***/0.19	***/0.17	***/0.32	***/0.27	*/0.11	0.06	0.09	***/0.29	**/0.11	0.12	0.2	0	0.06	0.09	0.07	***/0.26	-0.13	-0.11	0.11	***/0.47	0.17	***/0.33	***/0.2	***/0.36	-0.02
Resting dendritic cells	**/0.17	0.07	-0.08	*/0.07	***/0.51	**/0.14	-0.08	***/0.22	**/0.2	-0.05	0.02	0.02	***/0.17	**/-0.24	0.09	**/0.14	**/0.16	-0.08	-0.02	-0.05	-0.15	0.05	0.04	-0.04	0.11	-0.04	0.02	*-0.24	NA	-0.1	*/0.23	0.08	-0.09	-0.02	0	*/-0.23
Activated dendritic cells	0.06	**/-0.25	*/-0.11	***/-0.14	*/0.09	-0.06	***/-0.32	0.01	-0.09	-0.12	-0.01	-0.07	*/-0.09	*/0.19	-0.05	***/-0.2	-0.01	0.06	***/-0.19	-0.03	0.11	-0.08	-0.14	-0.02	0.09	*/-0.09	-0.02	-0.08	-0.15	-0.05	**/-0.27	-0.15	*/-0.14	-0.02	***/-0.17	-0.2
Resting mast cells	***/-0.2	0.03	-0.01	***/0.15	***/-0.2	*/0.1	-0.01	***/-0.18	**/0.19	-0.16	-0.12	0.01	*/-0.11	-0.01	0.05	***/-0.24	***/-0.3	-0.2	-0.04	***/-0.14	-0.07	-0.12	0	*/-0.11	*/-0.16	**/-0.13	-0.12	0.07	*/0.19	0.12	0.04	0.01	*/0.14	0.07	*/0.12	-0.05
Activated mast cells	-0.06	-0.03	0.01	-0.03	**/-0.14	0	0.01	-0.03	-0.06	0.04	0.01	-0.05	0.03	*/0.2	0.04	*/0.1	0.01	-0.1	0.05	-0.03	0.04	0.05	-0.05	0.04	**/-0.21	*/0.09	-0.07	0.13	*/-0.22	-0.15	-0.01	0.19	-0.06	0.05	-0.05	0.08
Eosinophils	0.01	NA	*/-0.09	*/-0.06	***/-0.2	0.07	*/-0.11	*/-0.09	-0.01	-0.03	***/-0.26	-0.06	-0.07	0.04	*/0.11	**/-0.16	-0.08	-0.04	-0.04	**/-0.12	0.04	0.05	0.04	*/-0.09	-0.02	**/-0.12	-0.09	0.08	-0.05	0.07	0.13	0.03	0.02	-0.1	0.05	0.12
Neutrophils	0.08	-0.04	0.02	***/0.13	-0.03	0	0.09	0.01	-0.04	*/0.17	0.04	0.02	0.04	*/0.23	0.02	*/0.12	**/0.16	*/0.28	-0.02	***/0.15	-0.06	0.21	0.04	0	0.14	0.03	*/0.12	*/0.25	0.12	-0.26	0.02	-0.23	***/0.26	-0.03	***/0.19	0.14
